# Supplementary material for: Skeletal Muscle Mitochondrial and Perilipin Content in a Cohort of Obese Subjects Undergoing Moderate and High Intensity Training
Source: MDPI journal article supplement (doi:10.3390/metabo12090855), 2022-09-11
Supplement: s1 [file s1]

Original Western Blot and MyHC Gel figures of Figure S1.

**Skeletal muscle mitochondrial and perilipins content in a cohort of obese subjects undergoing high intensity and moderate training**

**Giuseppe Sirago<sup>1\*</sup>, Filippo Vaccari<sup>2,3</sup>, Stefano Lazzer<sup>2,3</sup>, Andrea D'Amuri<sup>4</sup>, Juana M. Sanz<sup>5</sup>, Marco V. Narici<sup>1</sup>, Carlo Reggiani<sup>1</sup>, Angelina Passaro<sup>4,6</sup> and Luana Toniolo<sup>1\*</sup>**

## TOMM20

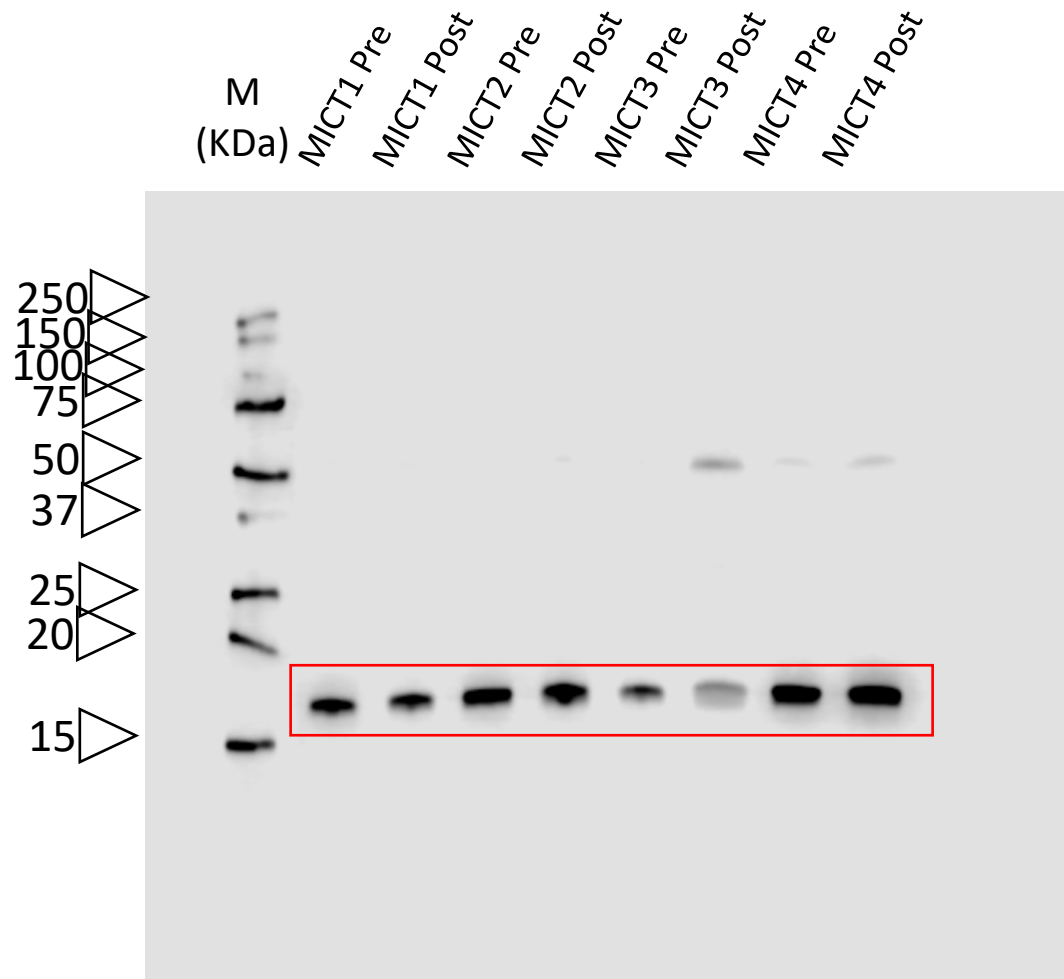

## Actin in Red Ponceau

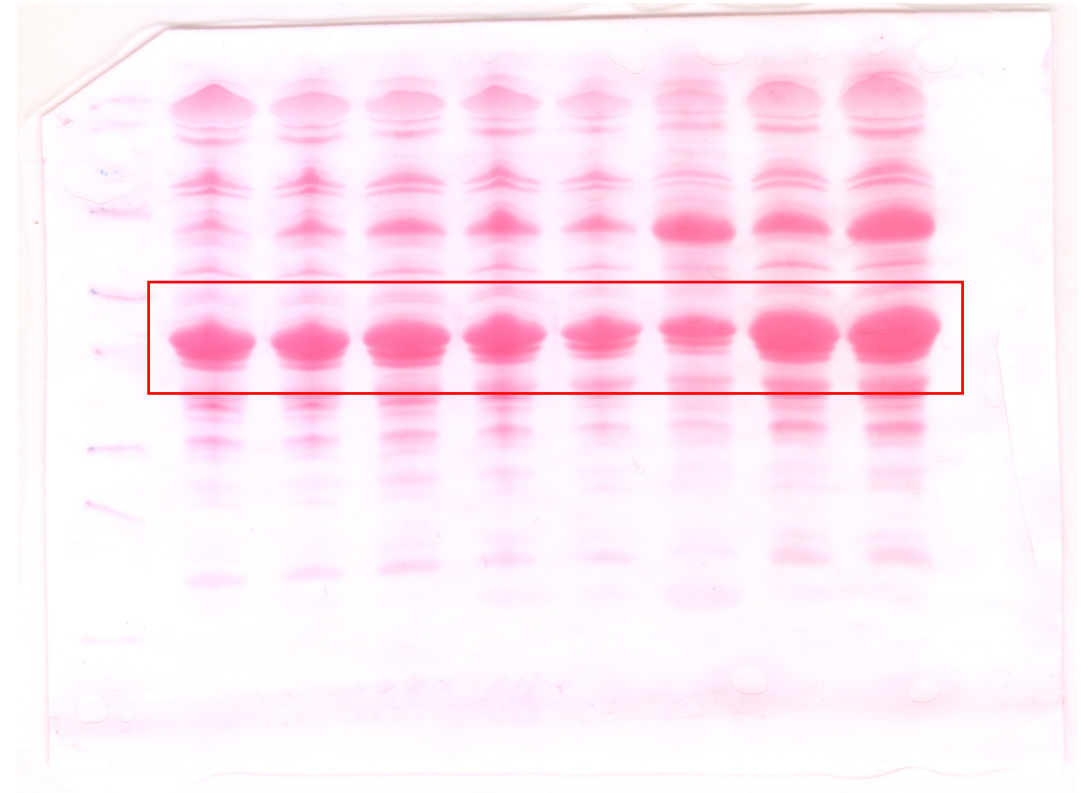

## TOMM20

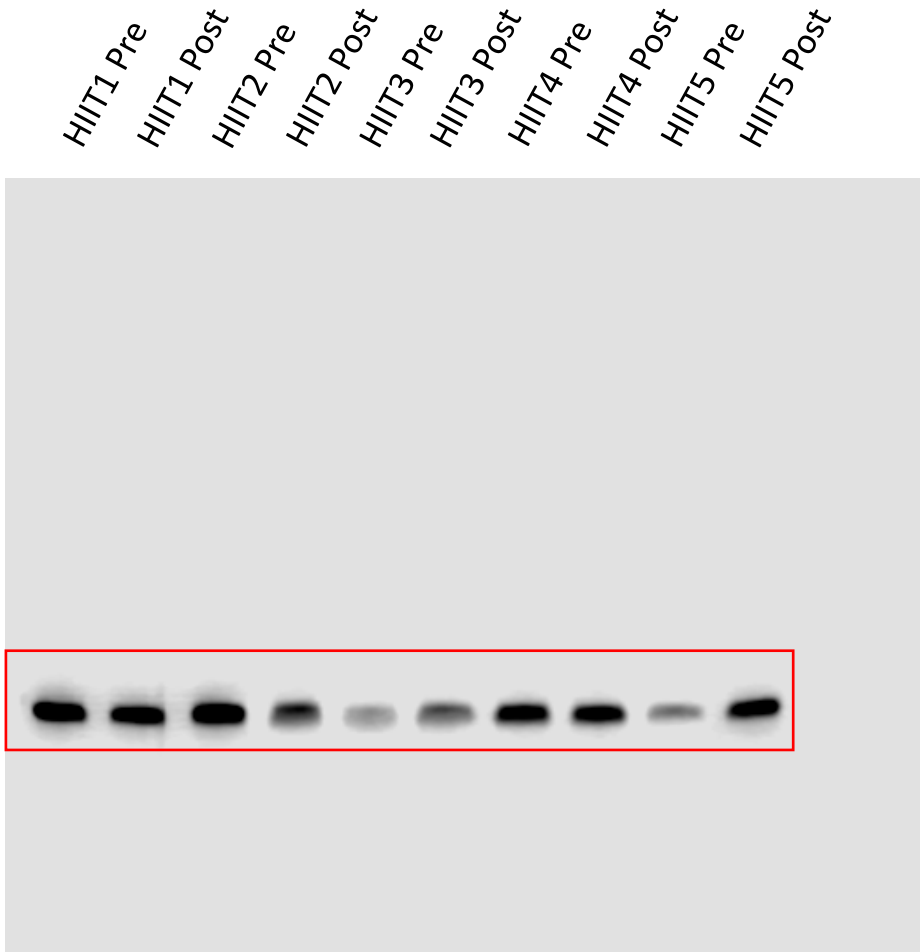

## Actin in Red Ponceau

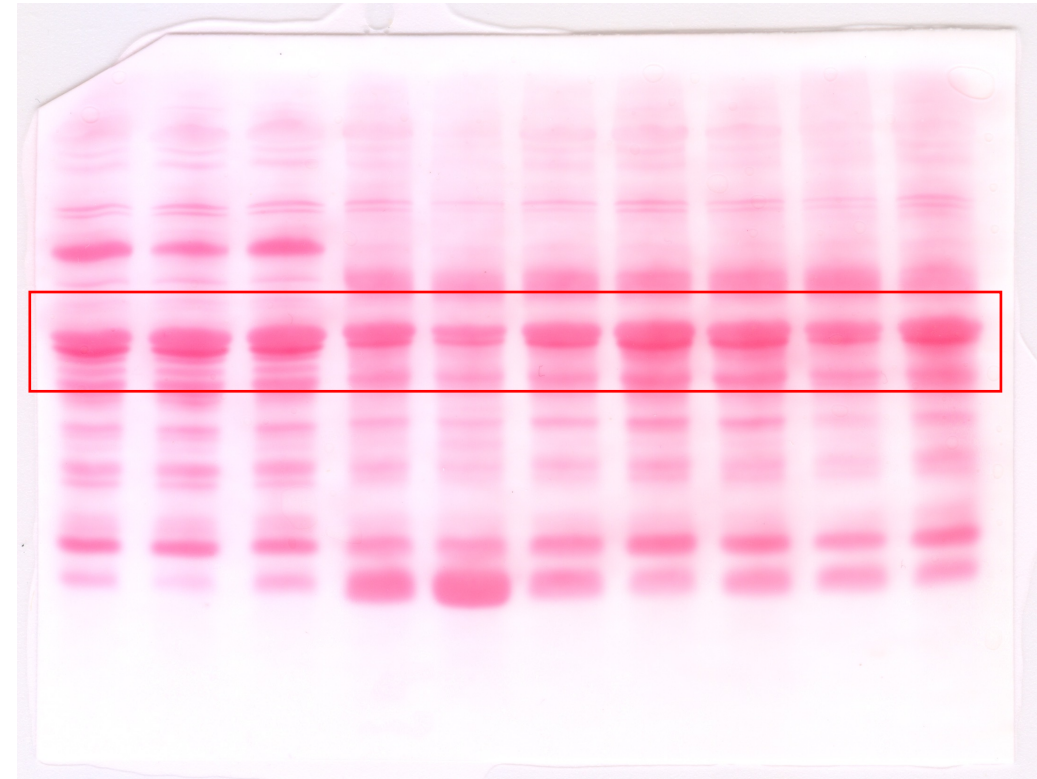

## TOMM20

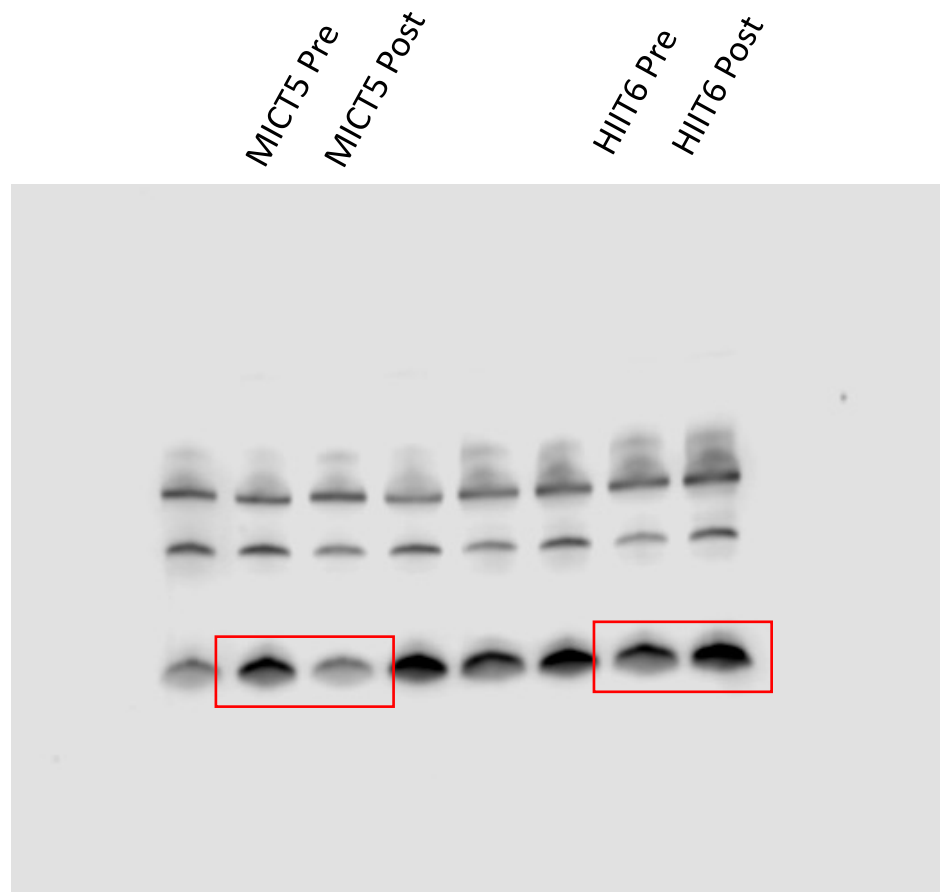

## Actin in Red Ponceau

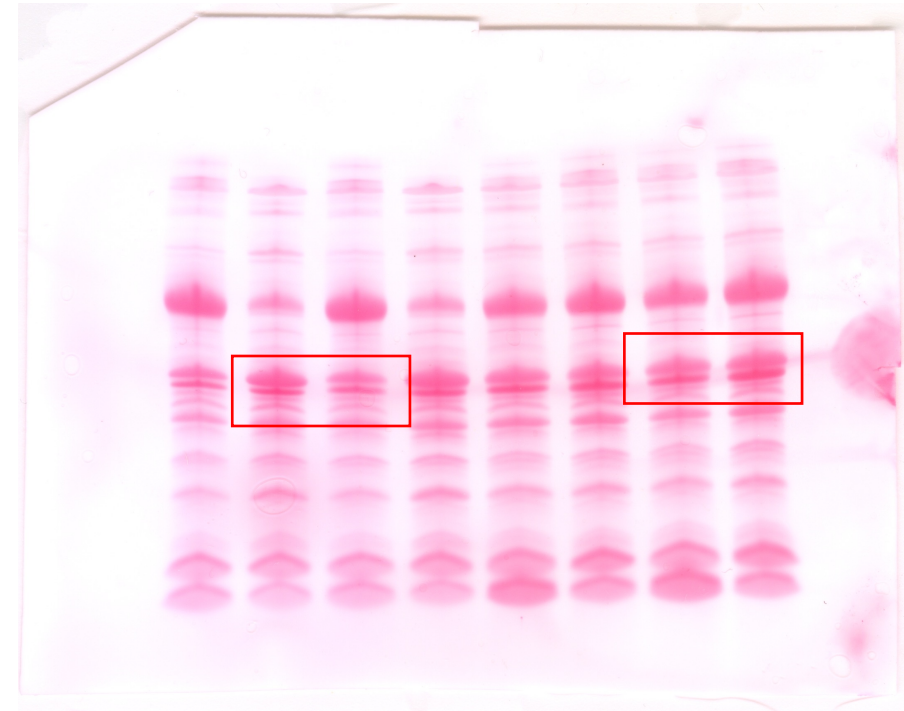

## Cox4

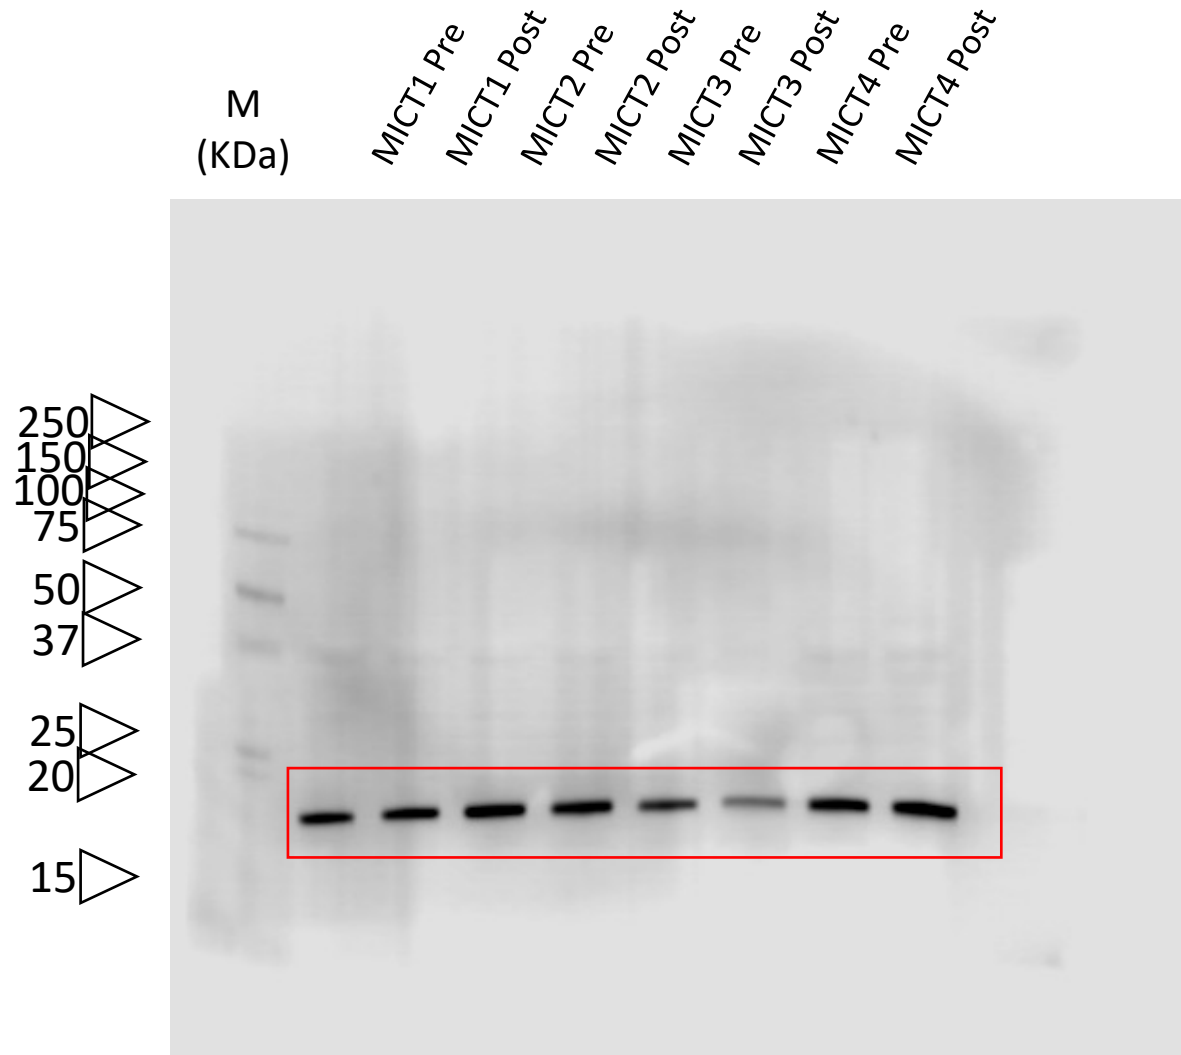

## Actin in Red Ponceau

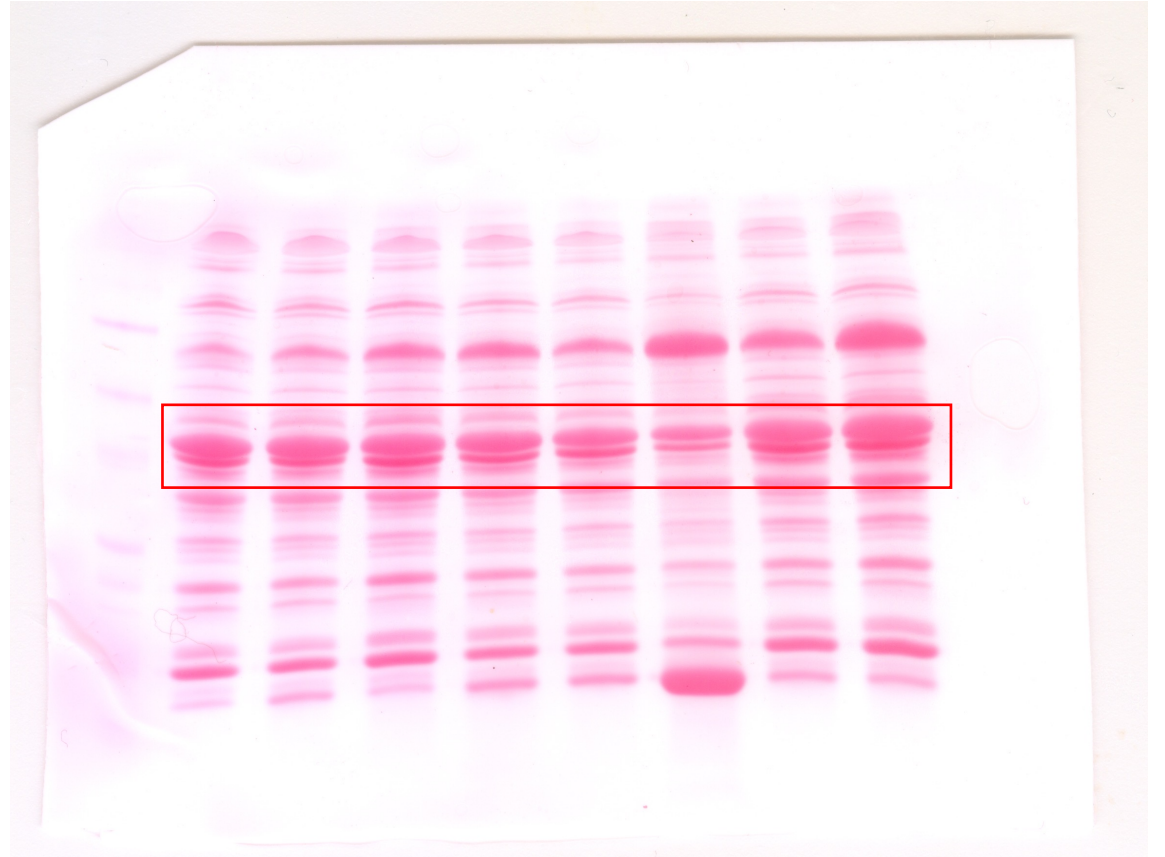

## Cox4

HIIT1 Pre  
HIIT1 Post  
HIIT2 Pre  
HIIT2 Post  
HIIT3 Pre  
HIIT3 Post  
HIIT4 Pre  
HIIT4 Post  
HIIT5 Pre  
HIIT5 Post

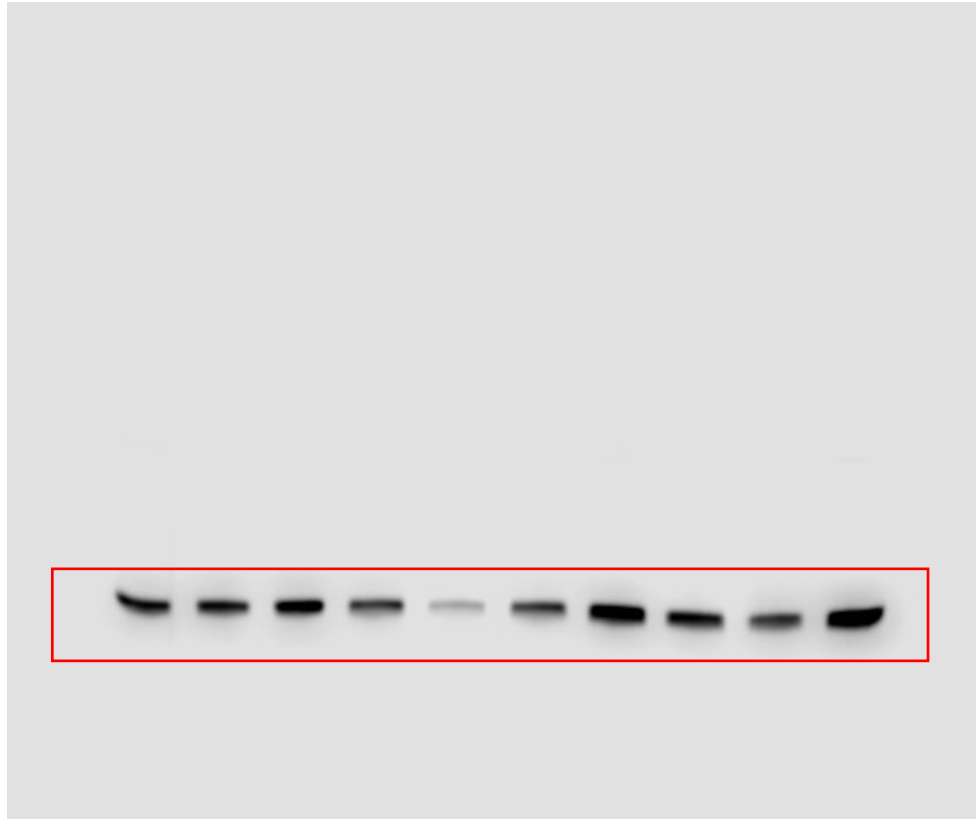

Actin in Red Ponceau

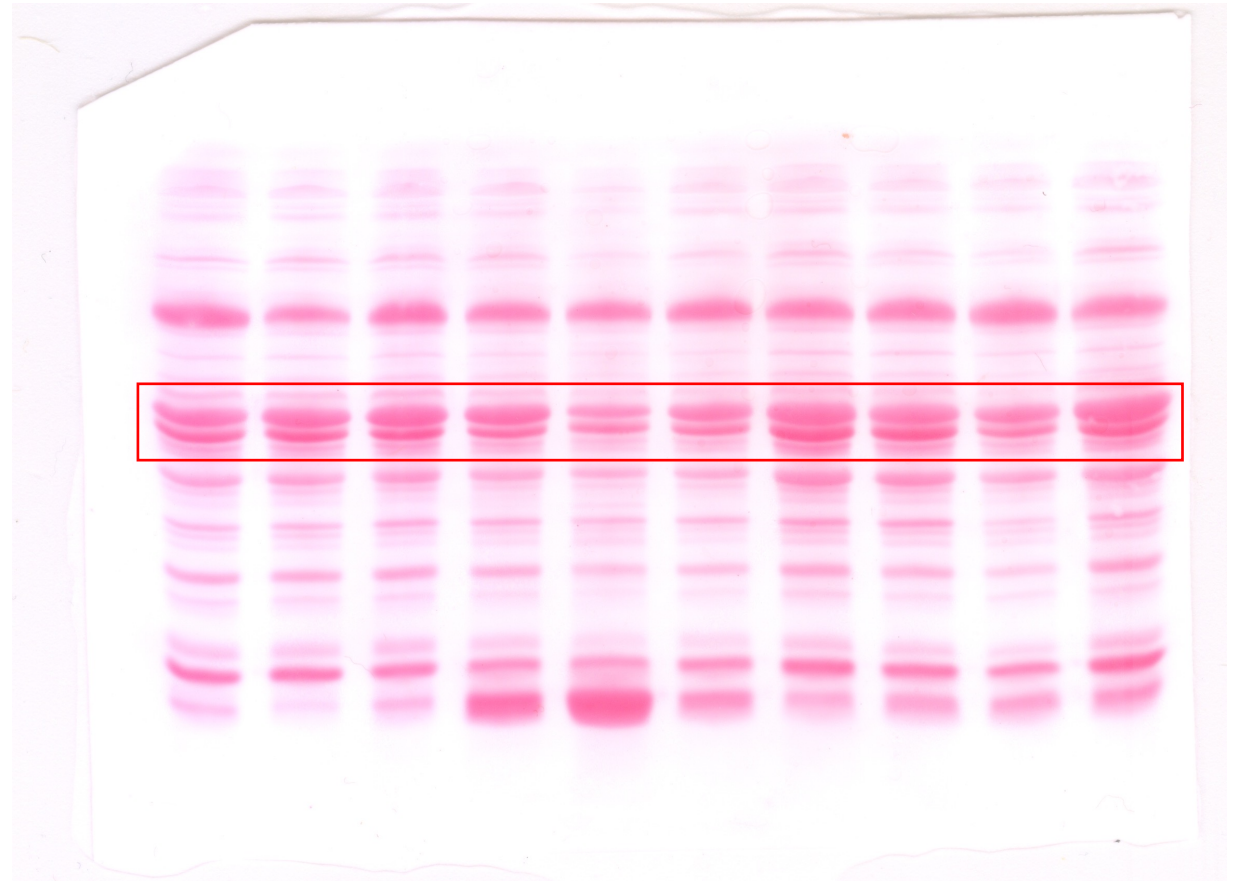



## Cox4

MICT5 Pre  
MICT5 Post

HIIT6 Pre  
HIIT6 Post

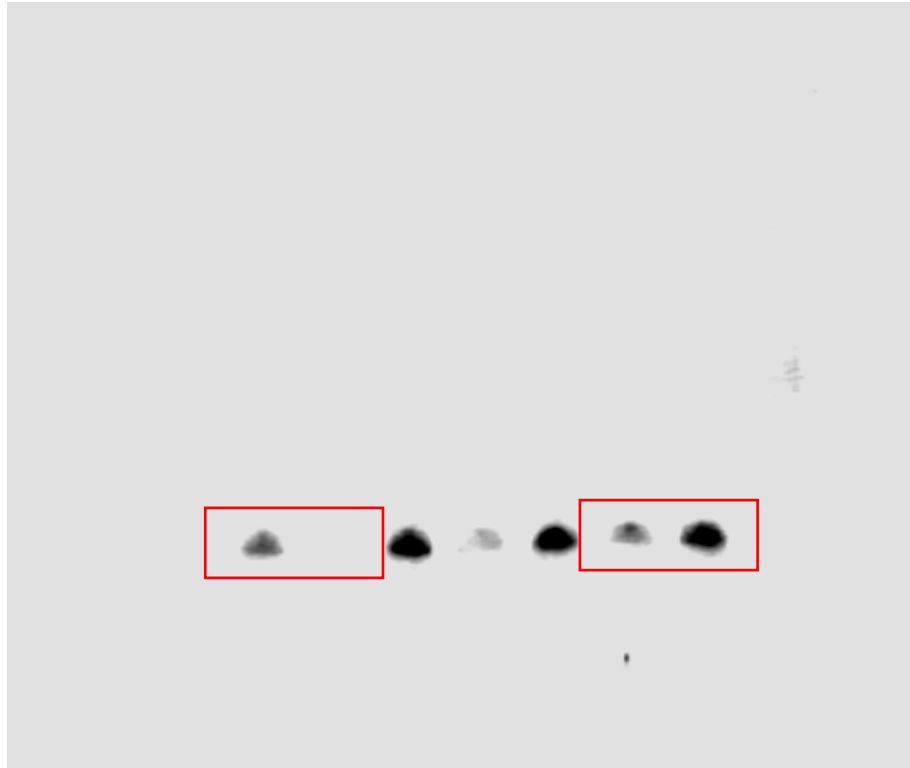

Actin in Red Ponceau

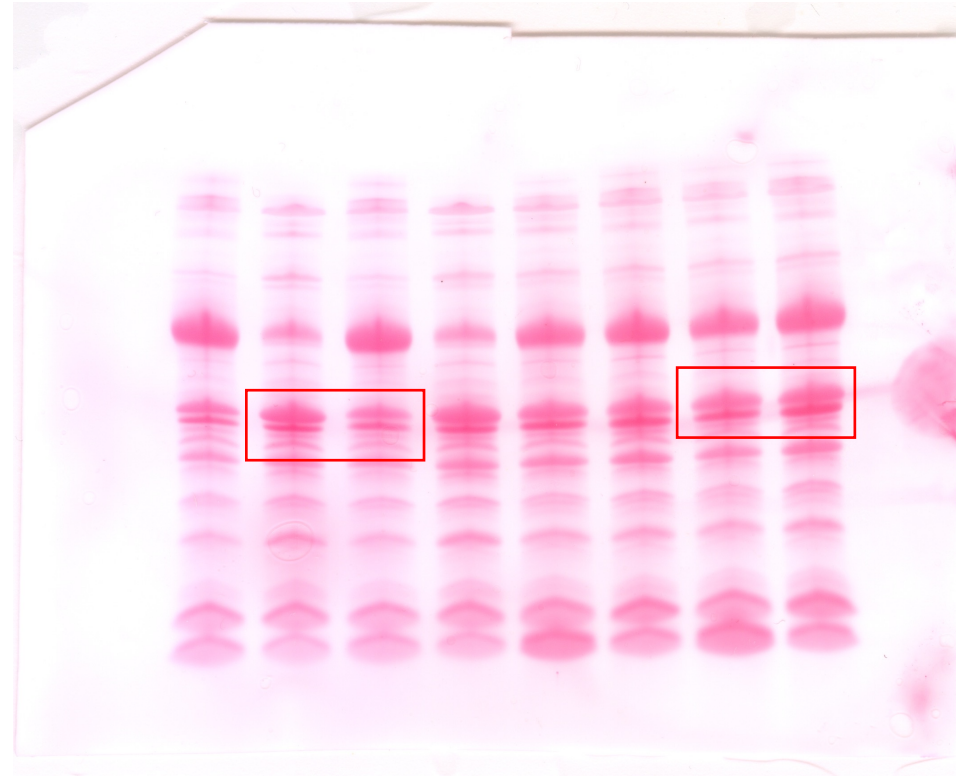

MyHC

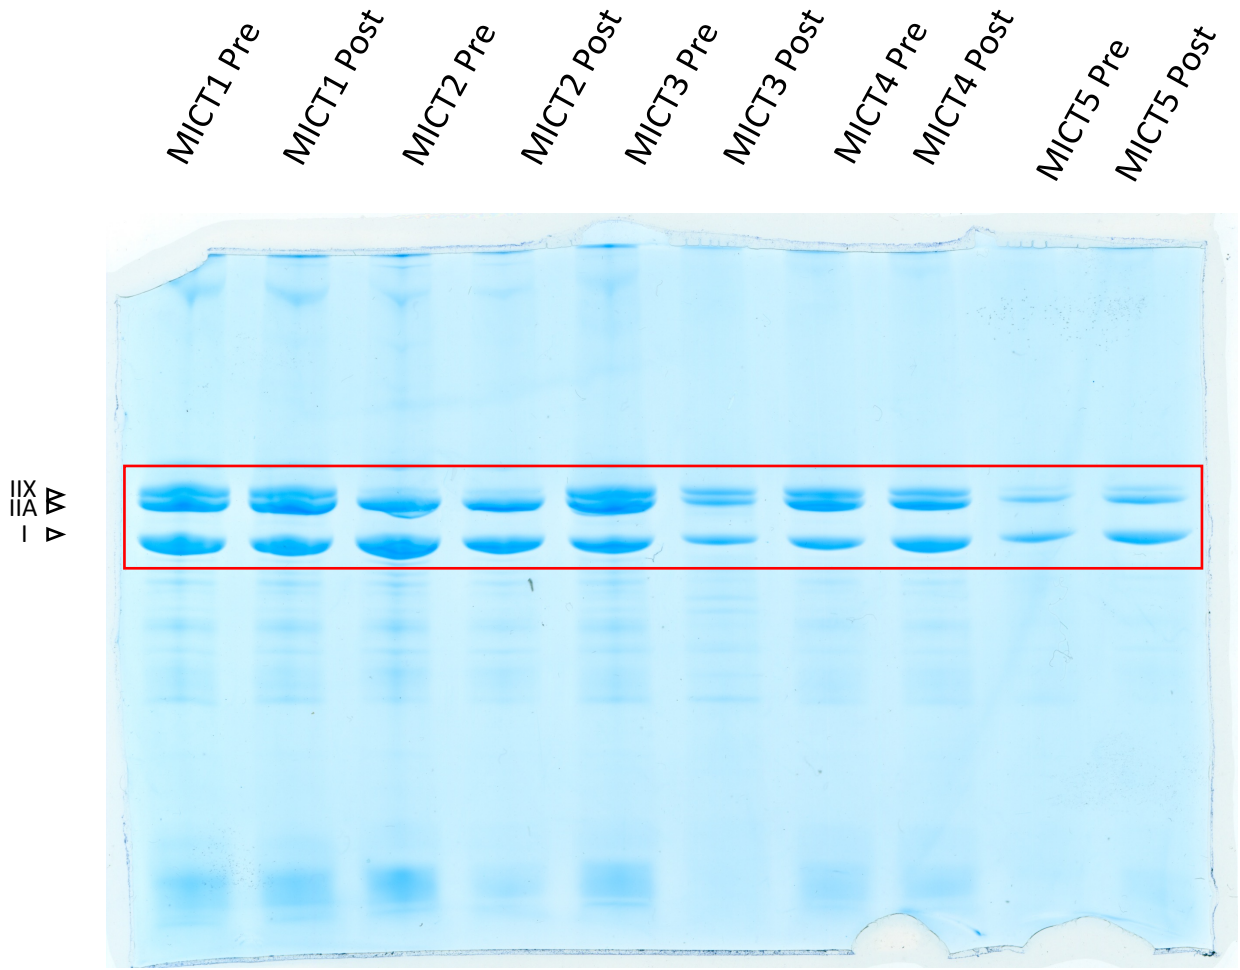



MyHC

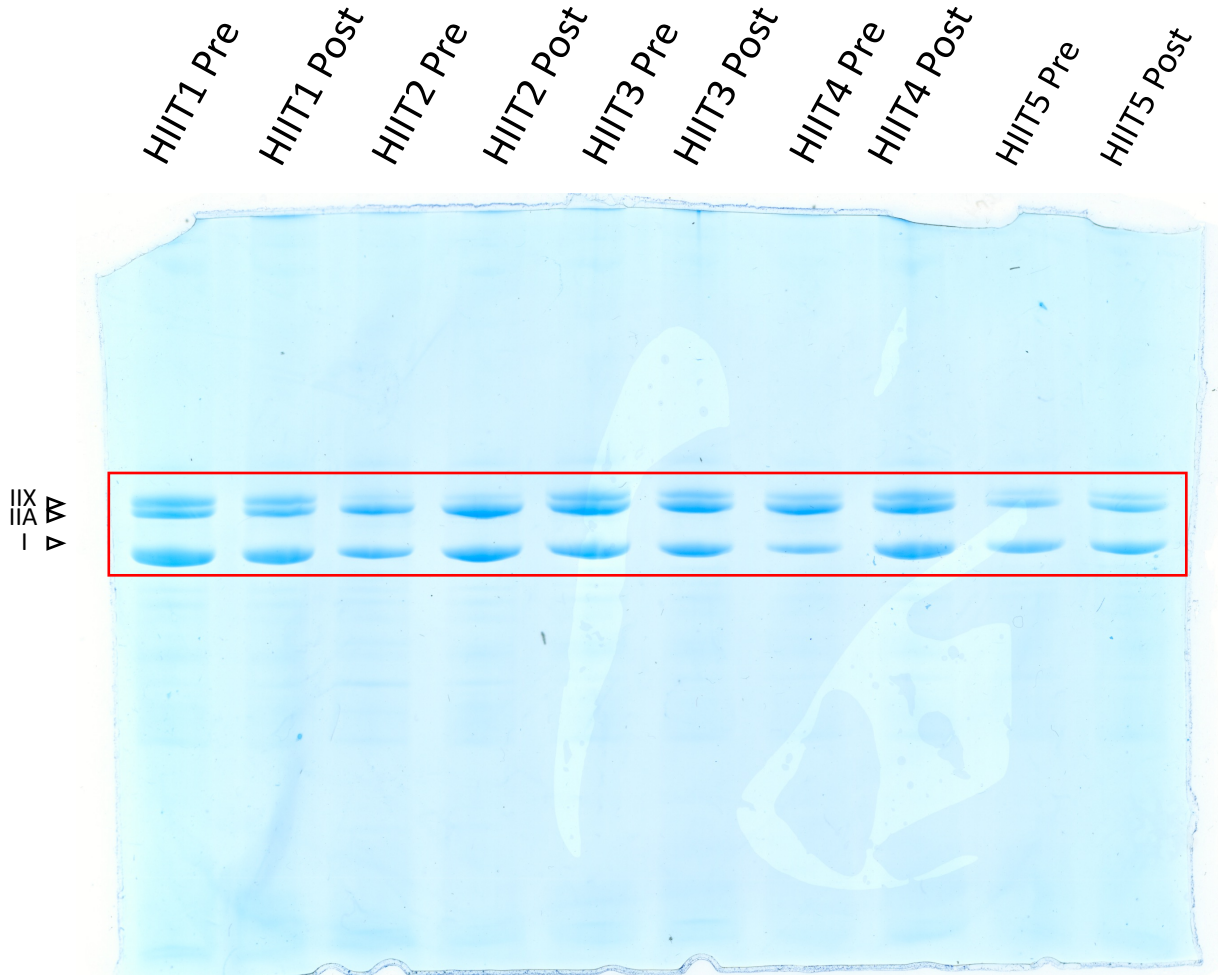

MyHC

HIIT6 Pre  
HIIT6 Post

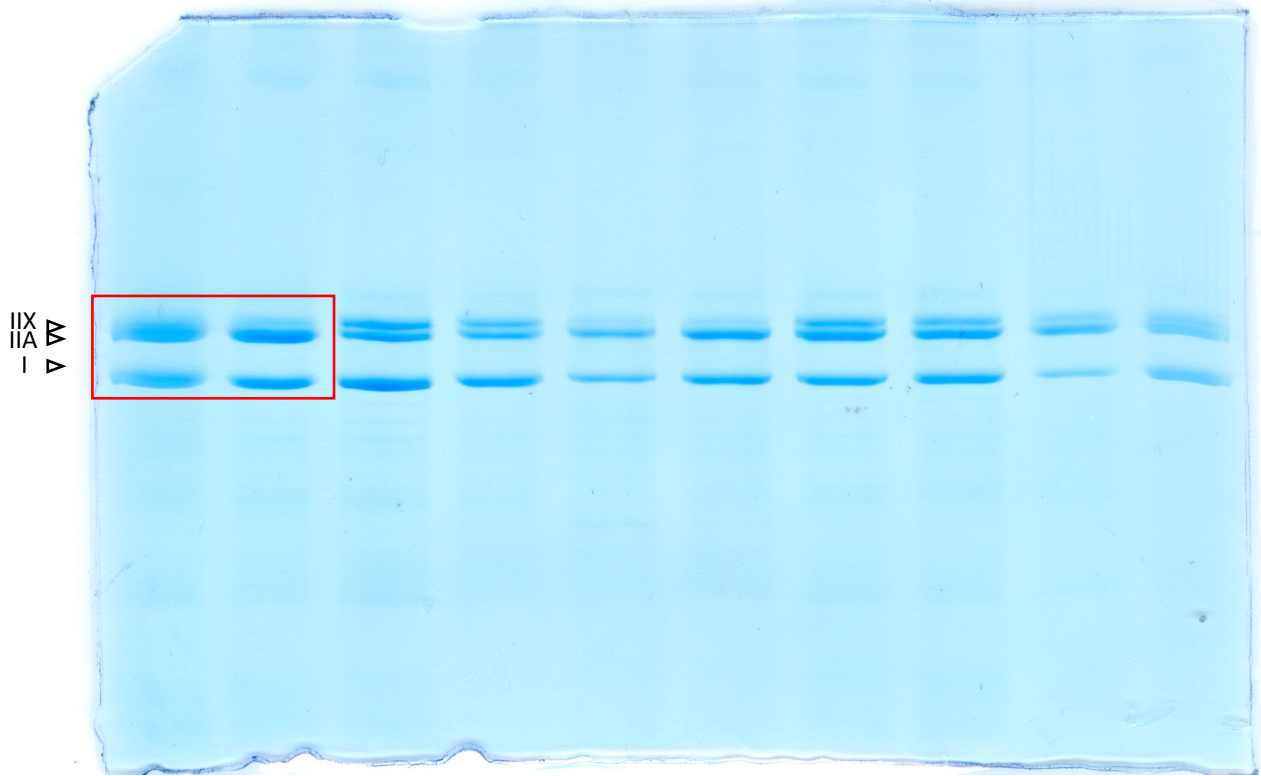

## PLIN2

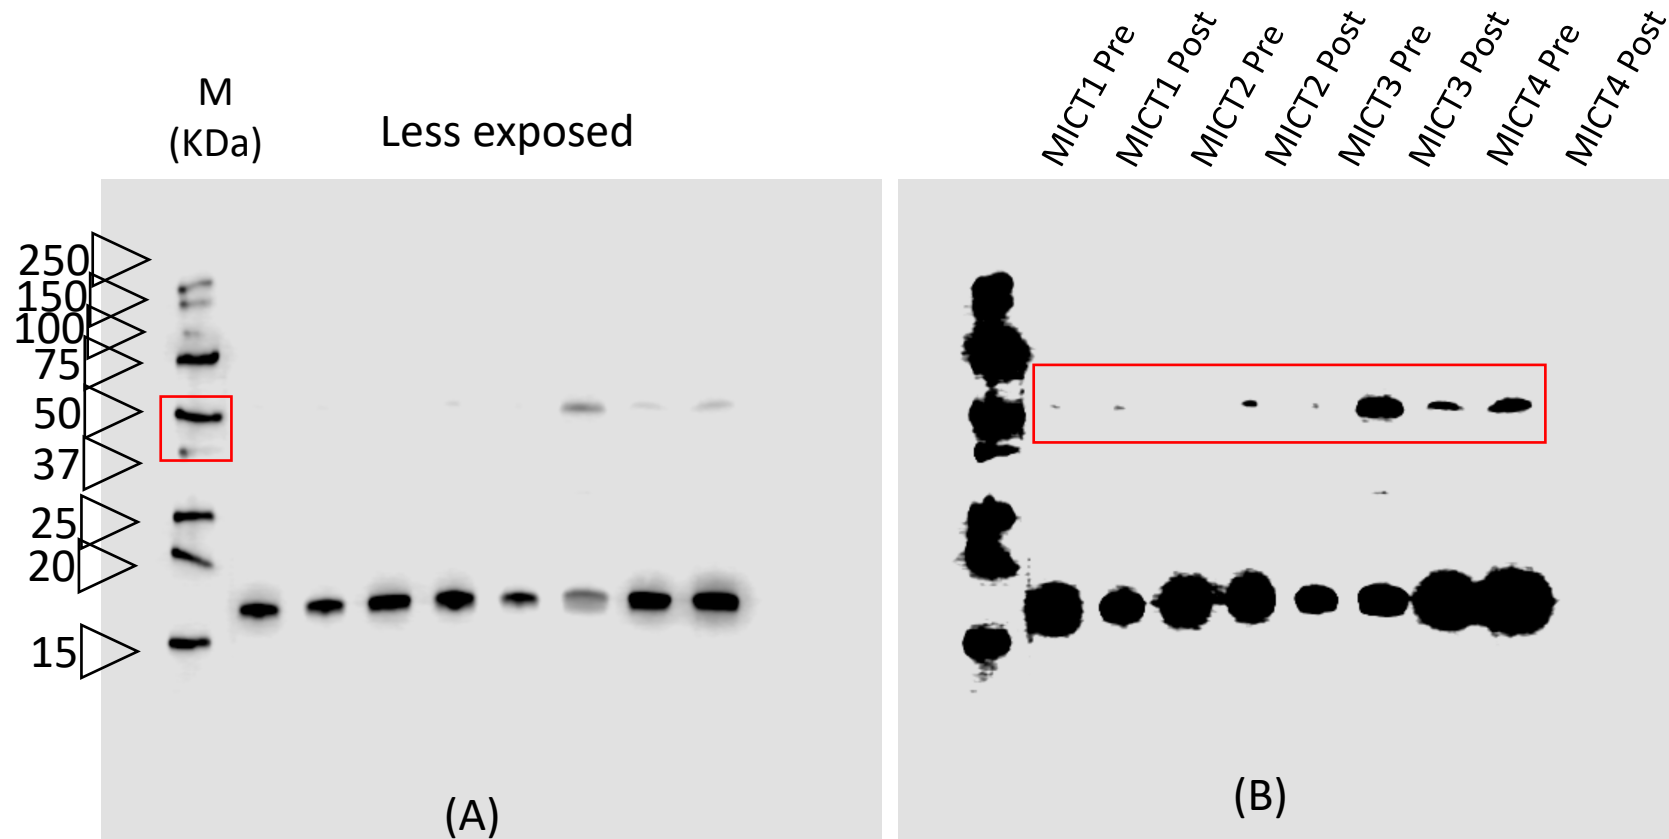

## Actin in Red Ponceau

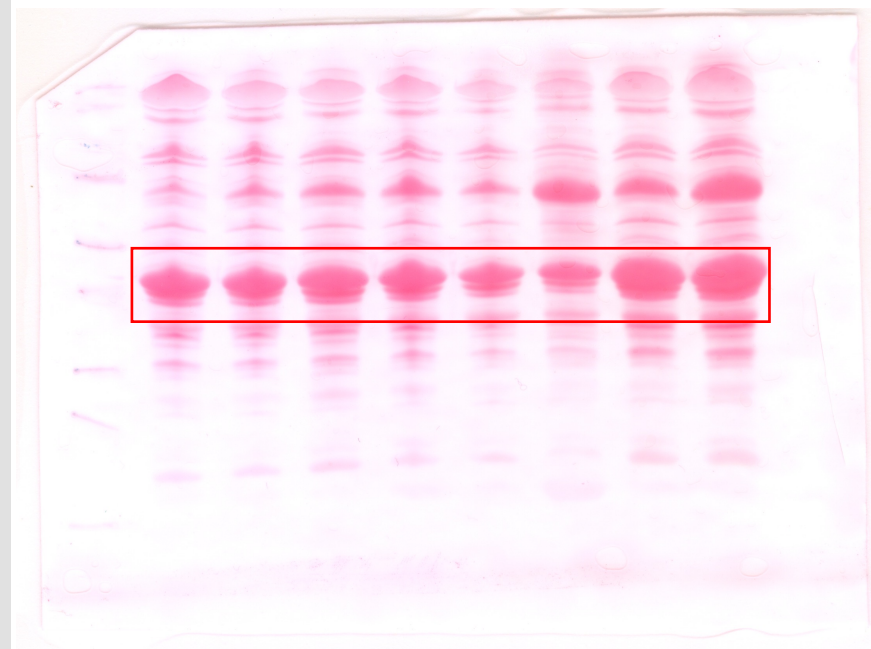

(A) and (B) are the same figure. (A) is less exposed than (B) to get a good visibility of the marker.

## PLIN2

HIIT1 Pre  
HIIT1 Post  
HIIT2 Pre  
HIIT2 Post  
HIIT3 Pre  
HIIT3 Post  
HIIT4 Pre  
HIIT4 Post  
HIIT5 Pre  
HIIT5 Post

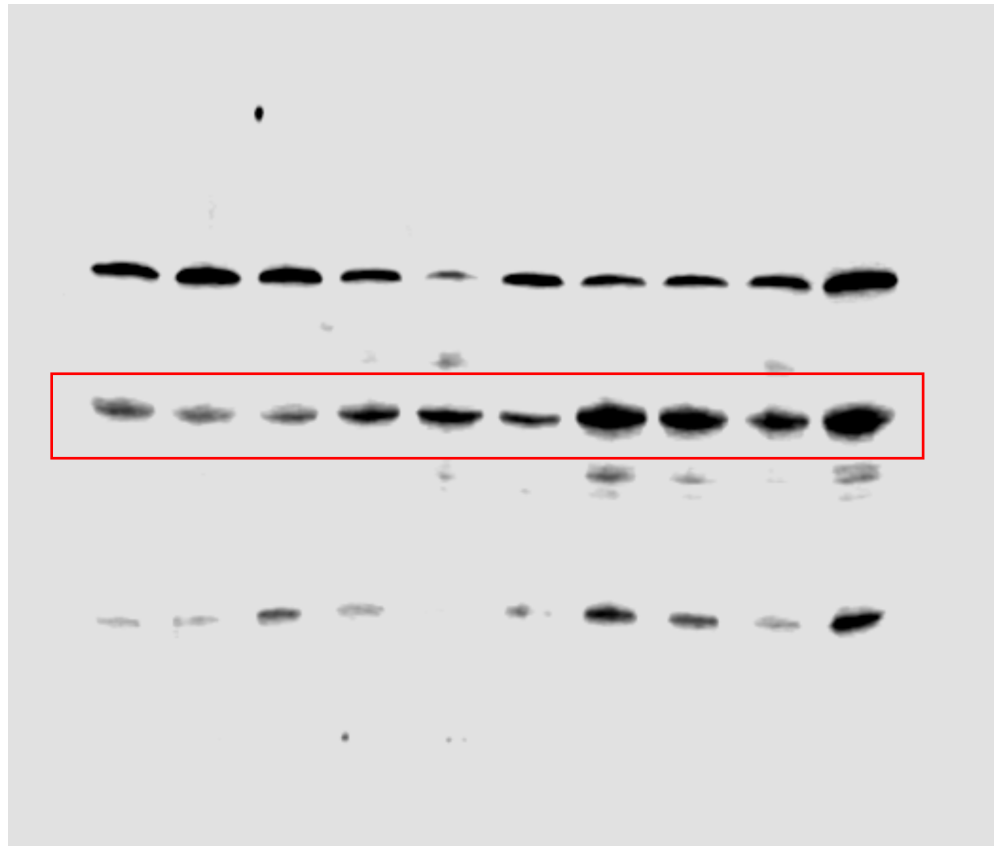

Actin in Red Ponceau

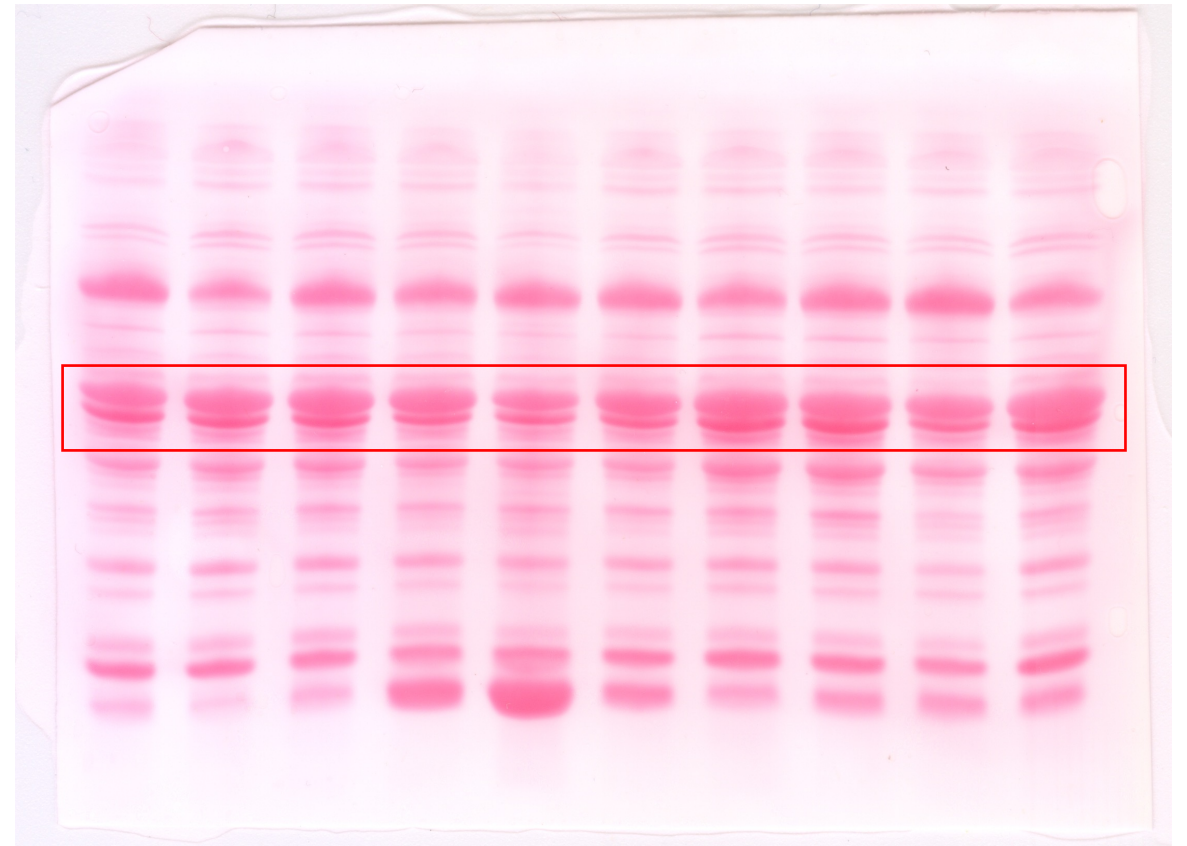

## PLIN2

MICT5 Pre  
MICT5 Post

HIIT6 Pre  
HIIT6 Post

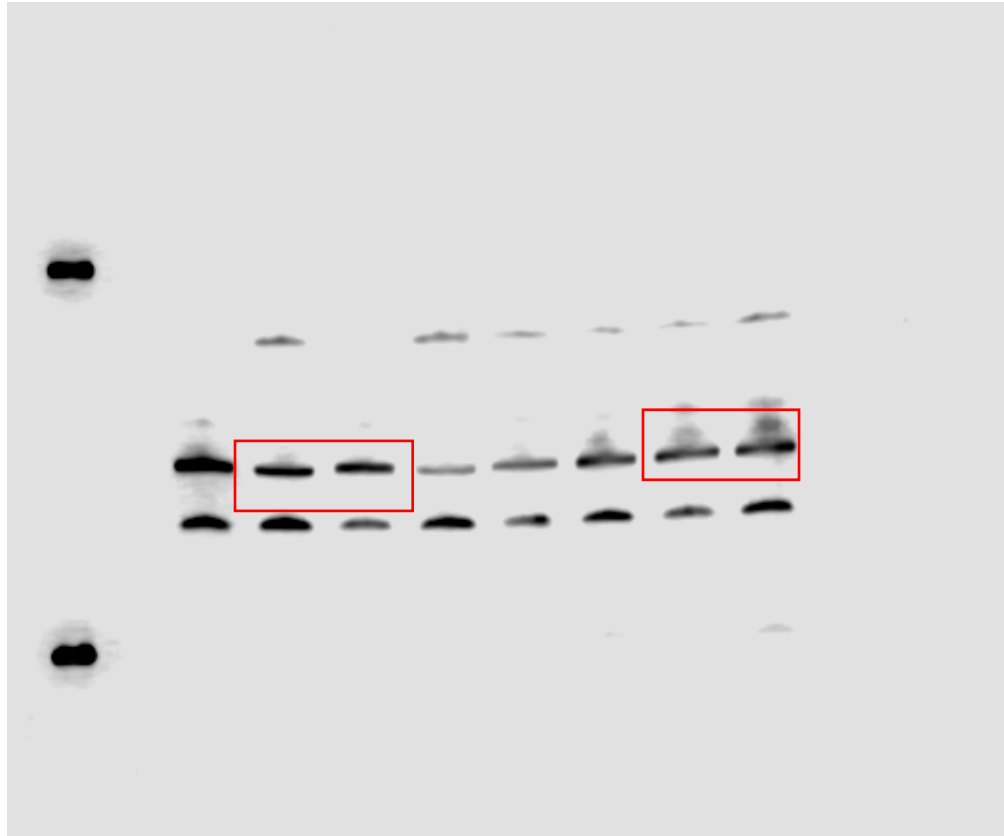

Actin in Red Ponceau

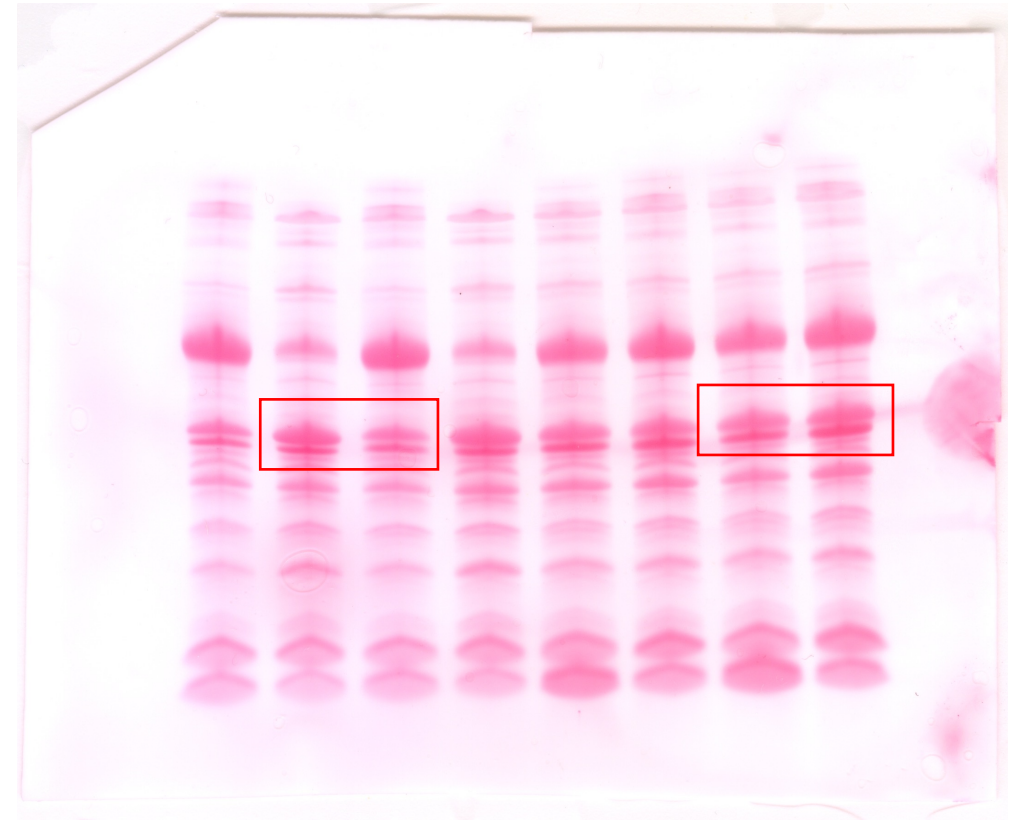



## PLIN5

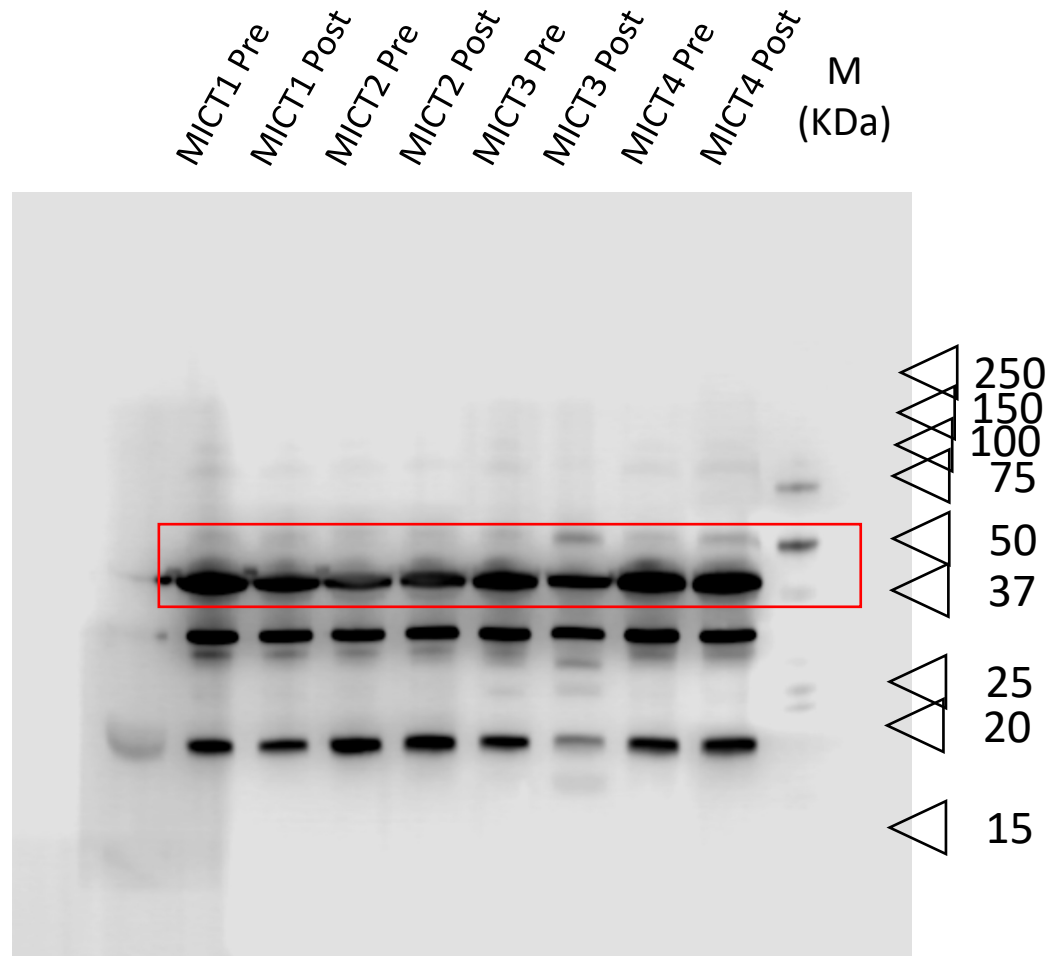

## Actin in Red Ponceau

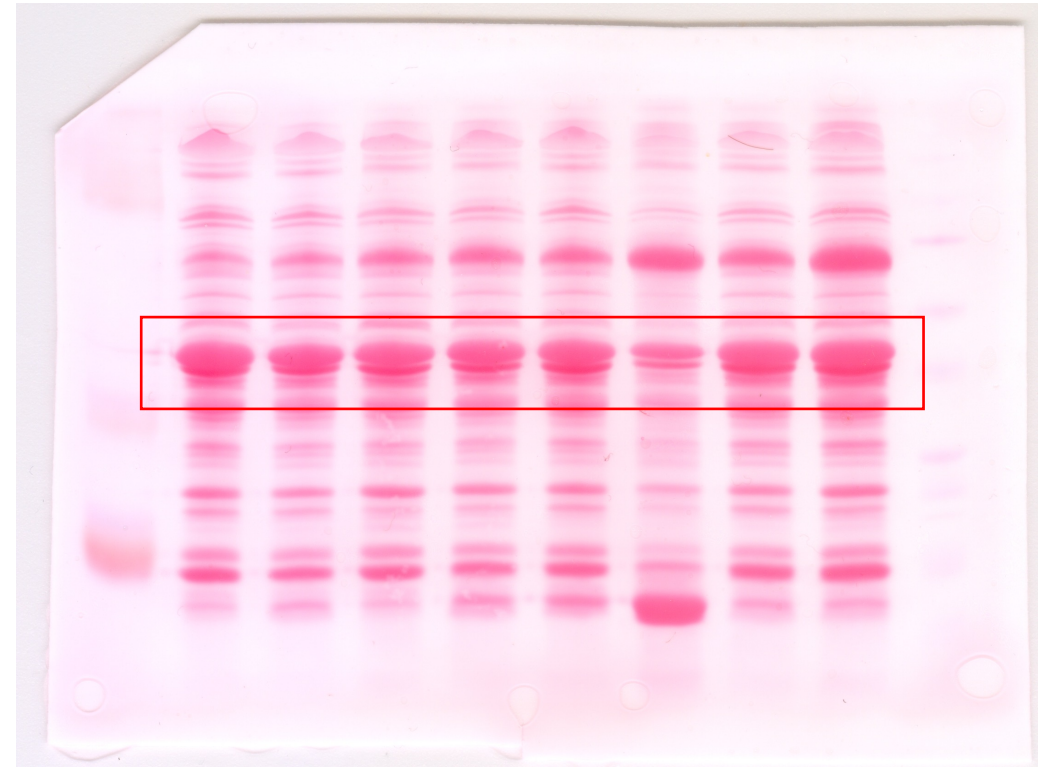

**Notes:** In figure 5 for MICT, samples are numbered in the order showed in the figure, here are numbered as correspondent to the same subject in agreement with all figures.



## PLIN5

HIIT1 Pre  
HIIT1 Post  
HIIT2 Pre  
HIIT2 Post  
HIIT3 Pre  
HIIT3 Post  
HIIT4 Pre  
HIIT4 Post  
HIIT5 Pre  
HIIT5 Post

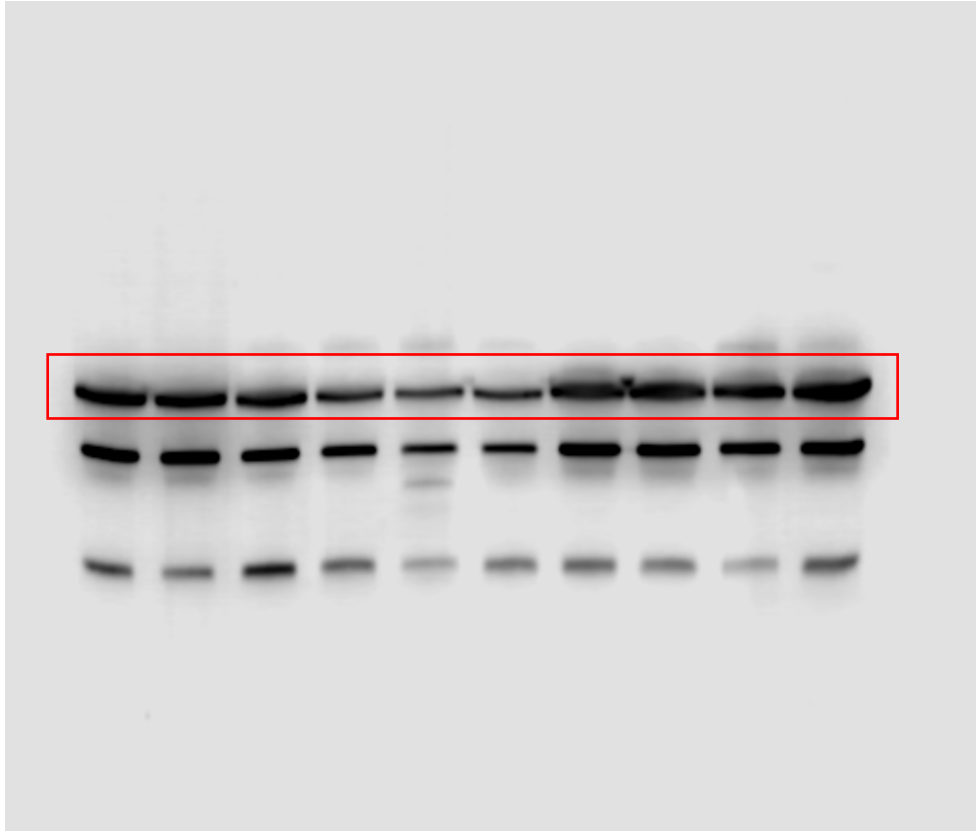

## PLIN5 HIIT

Actin in Red Ponceau

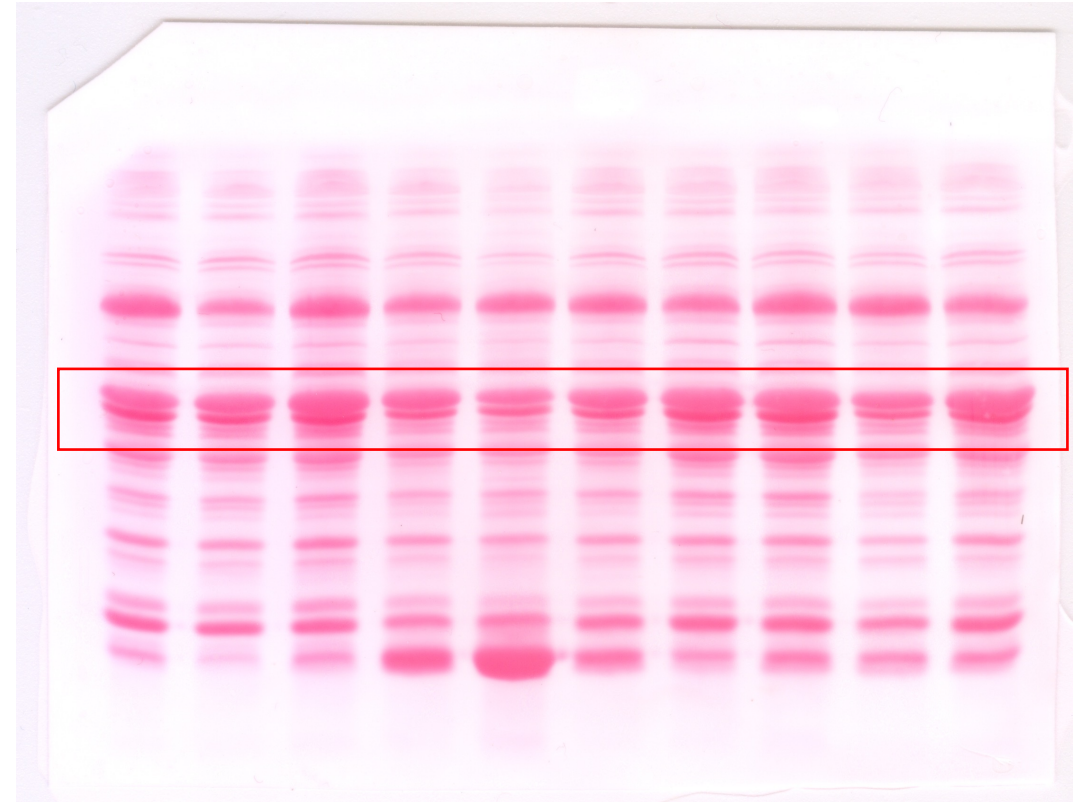

## PLIN5

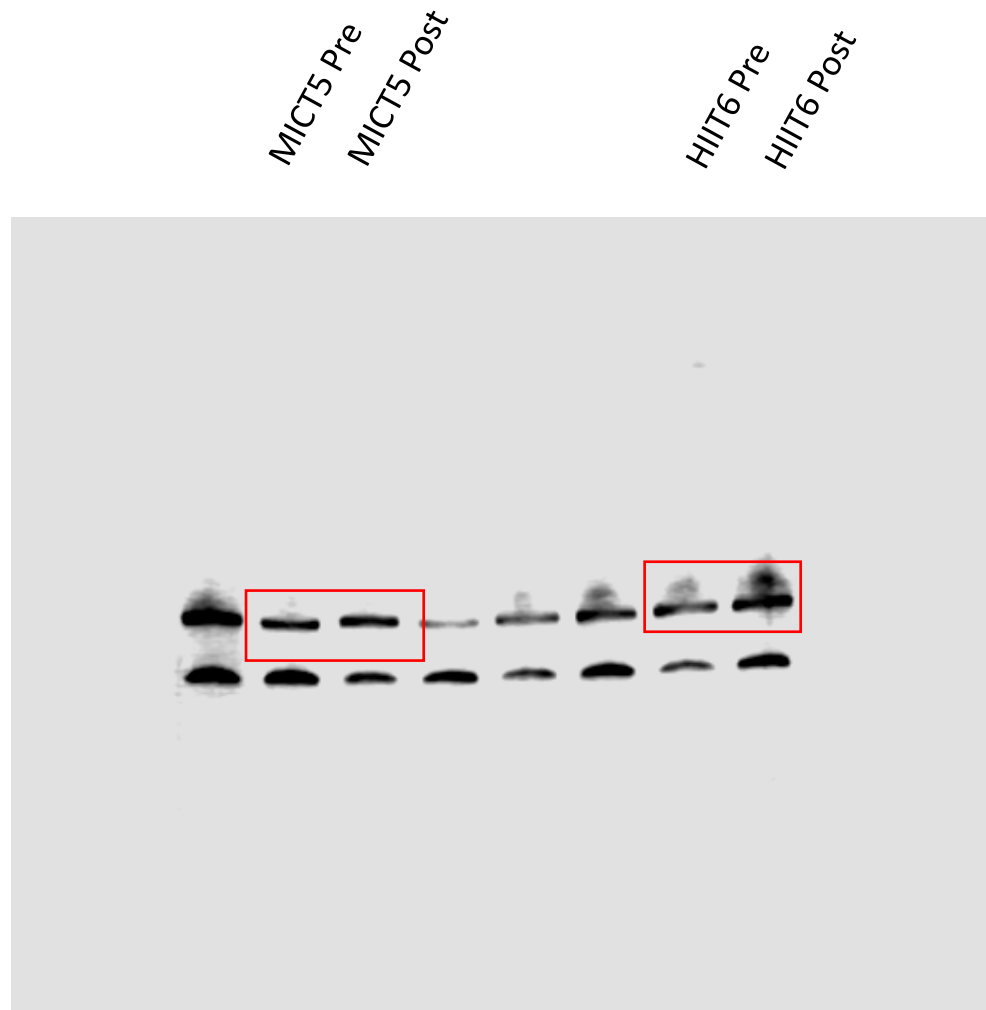

## Actin in Red Ponceau

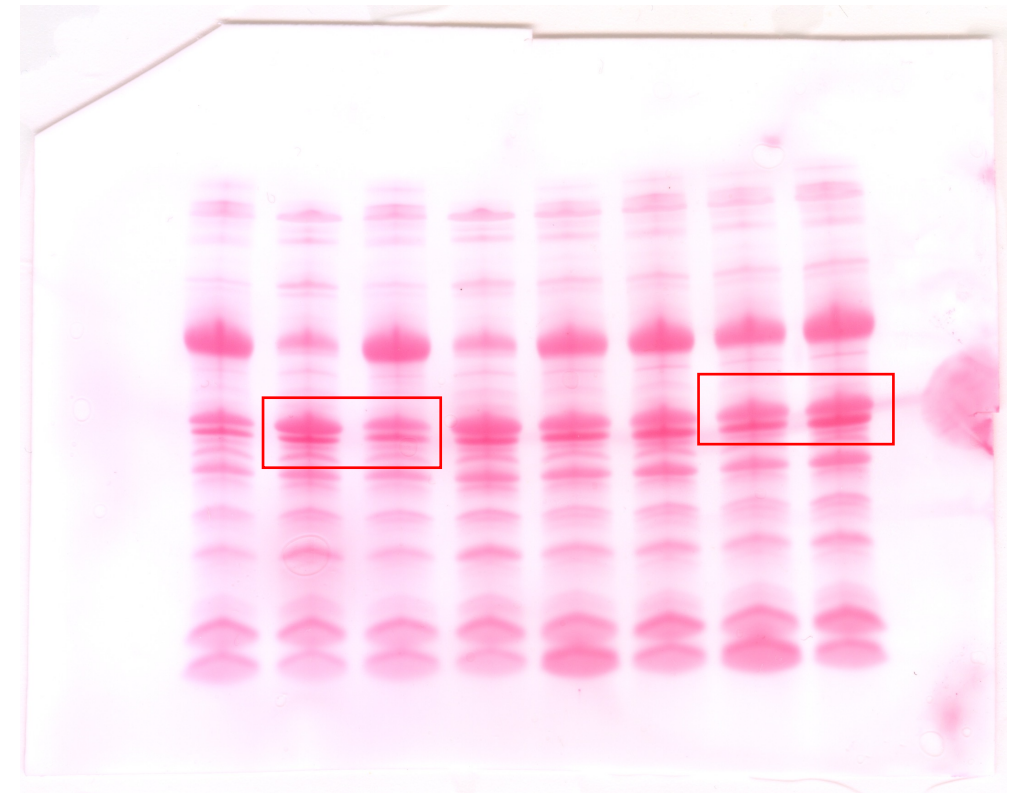

**Notes:** In figure 5 for MICT, samples are numbered in the order showed in the figure, here are numbered as correspondent to the same subject, in agreement with all figures.
